# Supplementary material for: Conditioned Medium from Malignant Breast Cancer Cells Induces an EMT-Like Phenotype and an Altered N-Glycan Profile in Normal Epithelial MCF10A Cells
Source: PubMed Central journal article supplement (PMC5577993; doi:10.3390/ijms18081528), 2017-08-01
Supplement: ijms-18-01528-s001.pdf [file ijms-18-01528-s001.pdf]

**Table S1.** Proposed structures and their molecular ions in MALDI-TOF/TOF-MS spectra of N-glycans from control and 453-CM-treated MCF10A cells.

| No. | Experimental <i>m/z</i> | Calculated <i>m/z</i> | Type              | Glycan Structure | Relative Intensity |                |
|-----|-------------------------|-----------------------|-------------------|------------------|--------------------|----------------|
|     |                         |                       |                   |                  | MCF-10A            | MCF-10A+453-CM |
| 1   | 1135.4716               | 1136.3964             | M+Na <sup>+</sup> |                  | 0.007              | ND             |
| 2   | 1257.52                 | 1257.4226             | M+Na <sup>+</sup> |                  | 0.023              | 0.014          |
| 3   | 1406.928                | 1406.663              | M+Na <sup>+</sup> |                  | 0.010              | 0.011          |
| 4   | 1419.584                | 1419.4775             | M+Na <sup>+</sup> |                  | 0.082              | 0.088          |
| 5   | 1581.652                | 1581.5283             | M+Na <sup>+</sup> |                  | 0.132              | 0.129          |
| 6   | 1590.271                | 1590.471              | M+Na <sup>+</sup> |                  | ND                 | 0.005          |
| 7   | 1668.592                | 1668.782              | M+Na <sup>+</sup> |                  | 0.013              | 0.015          |
| 8   | 1743.722                | 1743.5881             | M+Na <sup>+</sup> |                  | 0.333              | 0.340          |
| 9   | 1865.7683               | 1867.6571             | M+H <sup>+</sup>  |                  | 0.011              | 0.008          |
| 10  | 1905.796                | 1905.6339             | M+Na <sup>+</sup> |                  | 0.198              | 0.185          |
| 11  | 1955.802                | 1955.6972             | M+Na <sup>+</sup> |                  | 0.015              | 0.017          |
| 12  | 1969.877                | 1971.6921             | M+Na <sup>+</sup> |                  | ND                 | 0.006          |
| 13  | 2010.901                | 2012.7187             | M+Na <sup>+</sup> |                  | 0.014              | 0.014          |
| 14  | 2065.901                | 2067.6868             | M+Na <sup>+</sup> |                  | 0.010              | 0.009          |
| 15  | 2067.876                | 2069.7401             | M+Na <sup>+</sup> |                  | 0.012              | ND             |
| 16  | 2101.8652               | 2101.7551             | M+Na <sup>+</sup> |                  | 0.011              | 0.011          |
| 17  | 2117.8689               | 2117.75               | M+Na <sup>+</sup> |                  | 0.008              | 0.010          |
| 18  | 2156.966                | 2158.7766             | M+Na <sup>+</sup> |                  | 0.015              | 0.020          |

|    |           |           |                   |                                                                                     |       |       |
|----|-----------|-----------|-------------------|-------------------------------------------------------------------------------------|-------|-------|
|    |           |           |                   | 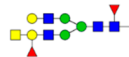   |       |       |
| 19 | 2174.972  | 2174.7715 | M+Na <sup>+</sup> |    | 0.009 | 0.009 |
| 20 | 2212.9369 | 2213.7447 | M+Na <sup>+</sup> |    | 0.008 | 0.007 |
| 21 | 2263.94   | 2263.8079 | M+Na <sup>+</sup> |    | 0.007 | 0.008 |
| 22 | 2302.9582 | 2304.8345 | M+Na <sup>+</sup> |    | 0.009 | 0.011 |
| 23 | 2319.9697 | 2320.8294 | M+Na <sup>+</sup> |    | 0.007 | 0.006 |
| 24 | 2358.027  | 2358.027  | M+Na <sup>+</sup> |    | 0.019 | 0.021 |
| 25 | 2421.368  | 2421.141  | M+Na <sup>+</sup> |    | 0.004 | 0.008 |
| 26 | 2504.0870 | 2504.0870 | M+Na <sup>+</sup> |    | 0.005 | 0.006 |
| 27 | 2522.0800 | 2522.0800 | M+Na <sup>+</sup> |    | ND    | 0.003 |
| 28 | 2560.106  | 2558.9483 | M+H <sup>+</sup>  |    | ND    | 0.004 |
| 29 | 2723.133  | 2667.133  | M+Na <sup>+</sup> |   | 0.004 | 0.003 |
| 30 | 2869.2300 | 2813.2300 | M+Na <sup>+</sup> |  | ND    | 0.003 |
| 31 | 2988.103  | 2988.342  | M+Na <sup>+</sup> |  | 0.004 | 0.003 |
| 32 | 3068.1506 | 3067.0887 | M+Na <sup>+</sup> |  | 0.010 | ND    |
| 33 | 3070.33   | 3070.33   | M+Na <sup>+</sup> |  | 0.011 | 0.019 |
| 34 | 3124.563  | 3012.563  | M+H <sup>+</sup>  |  | 0.004 | 0.009 |
| 35 | 3126.275  | 3070.275  | M+H <sup>+</sup>  |  | 0.009 | ND    |

**Table S2.** Relative variation of various types of *N*-glycans in DMEM/ 1% FBS-incubated and 453-CM-treated MCF10A.

| Glycan Types             | Relative variation (%) |               |
|--------------------------|------------------------|---------------|
|                          | MCF10A                 | MCF10A+453-CM |
| Hybrid                   | 0.7                    | 1.4           |
| High-mannose             | 79.6                   | 77.9          |
| Complex                  | 20.5                   | 21.2          |
| Biantennary              | 7.7                    | 9.5           |
| Tri- and Tetra-antennary | 10.4                   | 10.2          |
| Fucosylation             | 17.0                   | 21.3          |
| Bisecting GlcNAc         | 3.5                    | 3.7           |
